# Supplementary material for: Dietary Habits, Awareness, and Knowledge among Polish Healthcare Providers and Healthcare Students
Source: MDPI journal article supplement (doi:10.3390/healthcare12191931), 2024-09-26
Supplement: s1 [file s1]

## Dietary habits, awareness and knowledge among Polish healthcare providers

**Supplementary Table S1.** Sample characteristics by lifestyle variables according to sex and professional status.

|                                                            | Healthcare professionals |              | Medical students |              |
|------------------------------------------------------------|--------------------------|--------------|------------------|--------------|
|                                                            | Females (n=360)          | Males (n=53) | Females (n=186)  | Males (n=35) |
| <b>Waist circumference<sup>a</sup></b>                     |                          |              |                  |              |
| Within normal range                                        | 153 (42.5)               | 25 (47.2)    | 96 (51.6)        | 17 (48.6)    |
| Above normal range                                         | 94 (26.1)                | 10 (18.9)    | 20 (10.8)        | 5 (14.3)     |
| No data                                                    | 113 (31.4)               | 18 (33.9)    | 70 (37.6)        | 13 (37.1)    |
| <b>Sleep time on weekdays (hours/day)<sup>b</sup></b>      |                          |              |                  |              |
| ≤6                                                         | 133 (36.9)               | 19 (35.8)    | 58 (31.2)        | 14 (40.0)    |
| 7-8                                                        | 217 (60.3)               | 31 (58.5)    | 124 (66.7)       | 20 (57.1)    |
| ≥9                                                         | 10 (2.8)                 | 3 (5.7)      | 4 (2.1)          | 1 (2.9)      |
| <b>Sleep time on weekends (hours/day)<sup>c</sup></b>      |                          |              |                  |              |
| ≤6                                                         | 42 (11.6)                | 5 (9.5)      | 13 (6.9)         | 1 (2.9)      |
| 7-8                                                        | 236 (65.6)               | 36 (67.9)    | 110 (59.2)       | 23 (65.7)    |
| ≥9                                                         | 82 (22.8)                | 12 (22.6)    | 63 (33.9)        | 11 (31.4)    |
| <b>Recreational physical activity<sup>d</sup></b>          |                          |              |                  |              |
| Low                                                        | 108 (30.0)               | 11 (20.8)    | 57 (30.6)        | 11 (31.4)    |
| Moderate                                                   | 186 (51.7)               | 28 (52.8)    | 98 (52.7)        | 10 (28.6)    |
| High                                                       | 66 (18.3)                | 14 (26.4)    | 31 (16.7)        | 14 (40.0)    |
| <b>Eating away from home<sup>e</sup></b>                   |                          |              |                  |              |
| Never                                                      | 82 (22.8)                | 10 (18.9)    | 22 (11.8)        | 5 (14.3)     |
| 1–3 times per month                                        | 161 (44.7)               | 19 (35.8)    | 84 (45.2)        | 18 (51.4)    |
| Once a week                                                | 78 (21.7)                | 10 (18.9)    | 59 (31.7)        | 7 (20.0)     |
| Few times per week                                         | 35 (9.7)                 | 12 (22.6)    | 21 (24.4)        | 3 (8.6)      |
| Once a day                                                 | 3 (0.8)                  | 2 (3.8)      | 0 (0)            | 2 (5.7)      |
| Few times per day                                          | 1 (0.3)                  | 0 (0)        | 0 (0)            | 0 (0)        |
| <b>Self-assessed nutritional knowledge<sup>f</sup></b>     |                          |              |                  |              |
| Insufficient                                               | 23 (6.4)                 | 3 (5.7)      | 16 (8.6)         | 3 (8.6)      |
| Sufficient                                                 | 146 (40.6)               | 18 (33.9)    | 65 (34.9)        | 13 (37.1)    |
| Good                                                       | 145 (40.3)               | 25 (47.2)    | 84 (45.2)        | 15 (42.9)    |
| Very good                                                  | 46 (12.7)                | 7 (13.2)     | 21 (24.4)        | 4 (11.4)     |
| <b>Self-assessed dietary habits<sup>g</sup></b>            |                          |              |                  |              |
| Very poor                                                  | 6 (1.7)                  | 1 (1.8)      | 5 (2.7)          | 1 (2.9)      |
| Poor                                                       | 81 (22.5)                | 13 (24.5)    | 37 (19.9)        | 11 (31.4)    |
| Good                                                       | 241 (66.9)               | 34 (64.2)    | 130 (69.9)       | 20 (57.1)    |
| Very good                                                  | 32 (8.9)                 | 5 (9.5)      | 14 (7.5)         | 3 (8.6)      |
| <b>Adding extra salt to food after cooking<sup>h</sup></b> |                          |              |                  |              |
| Yes                                                        | 140 (38.9)               | 25 (47.2)    | 75 (40.3)        | 14 (40.0)    |
| No                                                         | 220 (61.1)               | 28 (52.8)    | 111 (59.7)       | 21 (4.2)     |
| <b>Adding sugar to hot drinks<sup>i</sup></b>              |                          |              |                  |              |
| Yes (sugar or honey)                                       | 119 (33.1)               | 19 (35.8)    | 45 (24.2)        | 8 (22.9)     |
| Yes (artificial sweeteners)                                | 15 (4.1)                 | 5 (9.5)      | 8 (4.3)          | 4 (11.4)     |
| No                                                         | 226 (62.8)               | 29 (54.7)    | 133 (71.5)       | 23 (65.7)    |
| <b>Snacking<sup>j</sup></b>                                |                          |              |                  |              |
| Never                                                      | 15 (4.2)                 | 5 (9.5)      | 18 (9.7)         | 1 (2.9)      |
| 1–3 times a month                                          | 27 (7.5)                 | 4 (7.5)      | 14 (7.5)         | 1 (2.9)      |
| Once a week                                                | 51 (14.2)                | 11 (20.7)    | 37 (19.9)        | 6 (17.1)     |
| Few times per week                                         | 144 (40.0)               | 15 (28.3)    | 74 (39.8)        | 14 (40.0)    |
| Once a day                                                 | 64 (17.8)                | 9 (17.0)     | 25 (13.4)        | 4 (11.4)     |
| Few times per day                                          | 59 (16.3)                | 9 (17.0)     | 18 (9.7)         | 9 (25.7)     |

**Supplementary Table S2.** Diet quality scores (in times/ day) expressed as pro-Healthy-Diet-Index (pHDI), non-Healthy-Diet-Index (nHDI), and consumption frequencies of the selected food items (median and interquartile range) in comparison with the Polish population data [12].

|                                                                       | Medical students<br>(n = 221) |                                  | Healthcare<br>professionals<br>(n = 413) |                                  | Polish population<br>data (n=565) |                                  |
|-----------------------------------------------------------------------|-------------------------------|----------------------------------|------------------------------------------|----------------------------------|-----------------------------------|----------------------------------|
|                                                                       | Median                        | Q <sub>25</sub> -Q <sub>75</sub> | Median                                   | Q <sub>25</sub> -Q <sub>75</sub> | Median                            | Q <sub>25</sub> -Q <sub>75</sub> |
| <b>pHDI-10</b>                                                        | <b>6.0</b>                    | <b>4.1-7.7</b>                   | <b>5.84</b>                              | <b>4.3-7.6</b>                   | <b>3.9</b>                        | <b>2.9-5.5</b>                   |
| Whole-meal bread                                                      | 0.50                          | 0.06-1.00                        | 0.5                                      | 0.14-1.0                         | 0.14                              | 0.06-0.50                        |
| Buckwheat, oats, whole grain pasta<br>and other coarse-ground groats  | 0.50                          | 0.14-0.50                        | 0.5                                      | 0.06-0.5                         | 0.14                              | 0.06-0.50                        |
| Milk                                                                  | 0.50                          | 0.06-1.00                        | 0.5                                      | 0.06-1.0                         | 0.50                              | 0.14-1.00                        |
| Fermented milk beverages                                              | 0.50                          | 0.14-0.50                        | 0.5                                      | 0.14-1.0                         | 0.14                              | 0.06-0.50                        |
| Fresh cheese (cottage cheese) curd<br>products                        | 0.14                          | 0.06-0.50                        | 0.5                                      | 0.14-1.0                         | 0.14                              | 0.06-0.50                        |
| White meat products                                                   | 0.50                          | 0.14-0.50                        | 0.5                                      | 0.14-0.5                         | 0.50                              | 0.14-0.50                        |
| Fish                                                                  | 0.06                          | 0.06-0.14                        | 0.14                                     | 0.06-0.14                        | 0.06                              | 0.06-1.00                        |
| Pulse-based food products                                             | 0.14                          | 0.06-0.50                        | 0.14                                     | 0.06-0.32                        | 0.06                              | 0.06-0.06                        |
| Fruits                                                                | 1.00                          | 0.50-2.00                        | 1.0                                      | 0.5-2.0                          | 0.50                              | 0.50-1.00                        |
| Vegetables                                                            | 2.00                          | 1.00-2.00                        | 1.0                                      | 1.0-2.0                          | 0.50                              | 0.50-1.00                        |
| <b>nHDI-14</b>                                                        | <b>3.3</b>                    | <b>2.3-4.8</b>                   | <b>4.0</b>                               | <b>2.5-5.7</b>                   | <b>4.5</b>                        | <b>3.1-6.1</b>                   |
| White bread                                                           | 0.50                          | 0.14-1.00                        | 0.5                                      | 0.14-1.0                         | 0.50                              | 0.50-1.00                        |
| White rice, white pasta, fine-ground<br>groats                        | 0.50                          | 0.14-0.50                        | 0.14                                     | 0.06-0.5                         | 0.14                              | 0.06-0.50                        |
| Fast foods                                                            | 0.06                          | 0.06-0.14                        | 0.06                                     | 0.06-0.14                        | 0.06                              | 0.06-0.14                        |
| Fried foods                                                           | 0.14                          | 0.06-0.50                        | 0.14                                     | 0.06-0.5                         | 0.50                              | 0.14-0.50                        |
| Butter, vegetable oils, margarines,<br>mixes of butter and margarines | 0.14                          | 0.06-0.50                        | 0.5                                      | 0.06-1.0                         | 0.50                              | 0.06-1.00                        |
| Lard (as an addition to bread or<br>dishes, for frying, baking, etc.) | 0.00                          | 0.00-0.00                        | 0.0                                      | 0.0-0.06                         | 0.00                              | 0.00-0.06                        |
| Cheese                                                                | 0.50                          | 0.14-0.50                        | 0.5                                      | 0.14-0.5                         | 0.50                              | 0.14-0.50                        |
| Cold meats, smoked sausages, hot-<br>dogs                             | 0.14                          | 0.06-0.50                        | 0.5                                      | 0.06-0.5                         | 0.50                              | 0.14-0.50                        |
| Red meat products                                                     | 0.06                          | 0.06-0.14                        | 0.14                                     | 0.06-0.5                         | 0.14                              | 0.06-0.50                        |
| Sweets                                                                | 0.50                          | 0.14-0.50                        | 0.5                                      | 0.14-1.0                         | 0.50                              | 0.14-0.50                        |
| Tinned meat                                                           | 0.00                          | 0.00-0.00                        | 0.0                                      | 0.0-0.06                         | 0.00                              | 0.00-0.06                        |
| Sweetened beverages                                                   | 0.06                          | 0.00-0.06                        | 0.06                                     | 0.0-0.14                         | 0.06                              | 0.06-0.50                        |
| Energy drinks                                                         | 0.00                          | 0.00-0.06                        | 0.0                                      | 0.0-0.06                         | 0.00                              | 0.00-0.06                        |
| Alcoholic beverages                                                   | 0.06                          | 0.06-0.14                        | 0.06                                     | 0.06-0.14                        | 0.06                              | 0.06-0.14                        |

**Supplementary Table S3.** The content of the nutrition knowledge test according to the KomPAN questionnaire [9-11].

| <b>Nutrition knowledge statements</b>                                                   |
|-----------------------------------------------------------------------------------------|
| It is enough to eat whole grains/ cereals once a day.                                   |
| Only children and adolescents should drink milk.                                        |
| Fruit and /or vegetables should be consumed with every meal.                            |
| Consumption of moldy bread can result in food poisoning caused by Salmonella.           |
| High intakes of salt protect from hypertension.                                         |
| Limiting high-fat foods in everyday diet is protective against cardiovascular diseases. |
| Frequent consumption of oily fish contributes to atherosclerosis.                       |
| Frequent consumption of grilled meats contributes to the onset of cancer.               |
| Vegetarian diet increases the risk of anemia.                                           |
| Bio-yoghurts contain beneficial gut bacteria.                                           |
| Vegetable oils and olive oil contain a high amount of cholesterol.                      |
| Whole-meal bread has more fiber than white bread.                                       |
| Fruit and vegetables are a source of 'empty calories'.                                  |
| Butter and fortified margarines have high content of vitamin A and D.                   |
| Cheese is a better source of calcium than cottage cheese.                               |
| Offal has high amounts of 'bad' cholesterol - LDL.                                      |
| In a healthy diet, complex carbohydrates should be replaced with simple sugars.         |
| In a balanced diet, proteins should be the main source of energy.                       |
| Inadequate intakes of vitamin PP can cause skin inflammation and diarrhea.              |
| Sun exposure increases the synthesis of vitamin D in the human body.                    |
| Phosphorus is a component of neural tissue.                                             |
| The ratio of calcium to phosphorus in a healthy diet should be 1:1.                     |
| Consumption of fruit with high content of vitamin C increases bioavailability of iron.  |
| Starting cooking vegetables in cold water helps to preserve the nutrients.              |
| Sweets and animal fats are particularly high nutrient dense foods.                      |
